# Supplementary material for: Integrative Network Fusion: a multi-omics approach in molecular profiling
Source: bioRxiv or medRxiv preprint supplement (doi:10.1101/2020.04.01.020685), 2020-04-03

# Supplementary Material

## 1 SUPPLEMENTARY FIGURES

**Figure S1.** UMAP projections on the BRCA-subtypes task with 3-layer juxtaposed data. Each subplot represents the projection of the TR/TS/TS2 partition for the remaining 9 splits not reported in the main text. Circle: TR set; triangle: TS set; diamond: TS2 set.

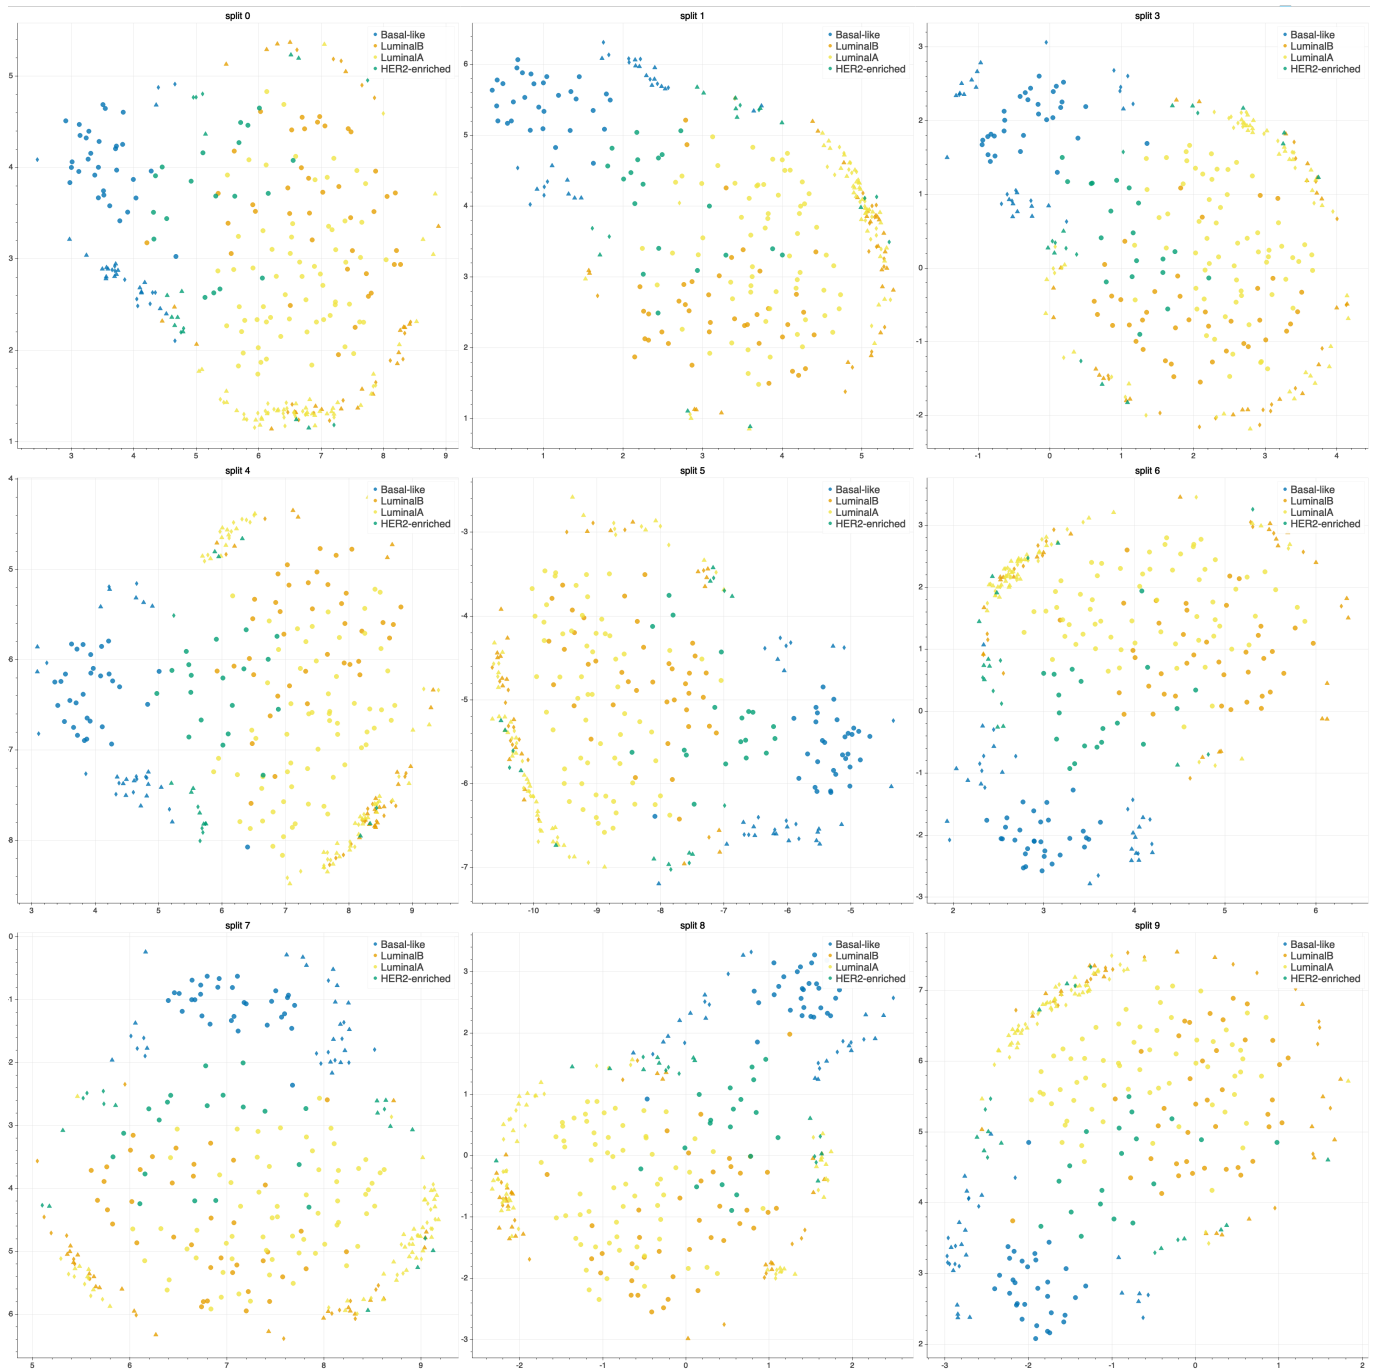

**Figure S2.** UMAP projections on the BRCA-subtypes task with 3-layer juxtaposed data restricted to the INF signature. Each subplot represents the projection of the TR/TS/TS2 partition for the remaining 9 splits not reported in the main text. Circle: TR set; triangle: TS set; diamond: TS2 set.

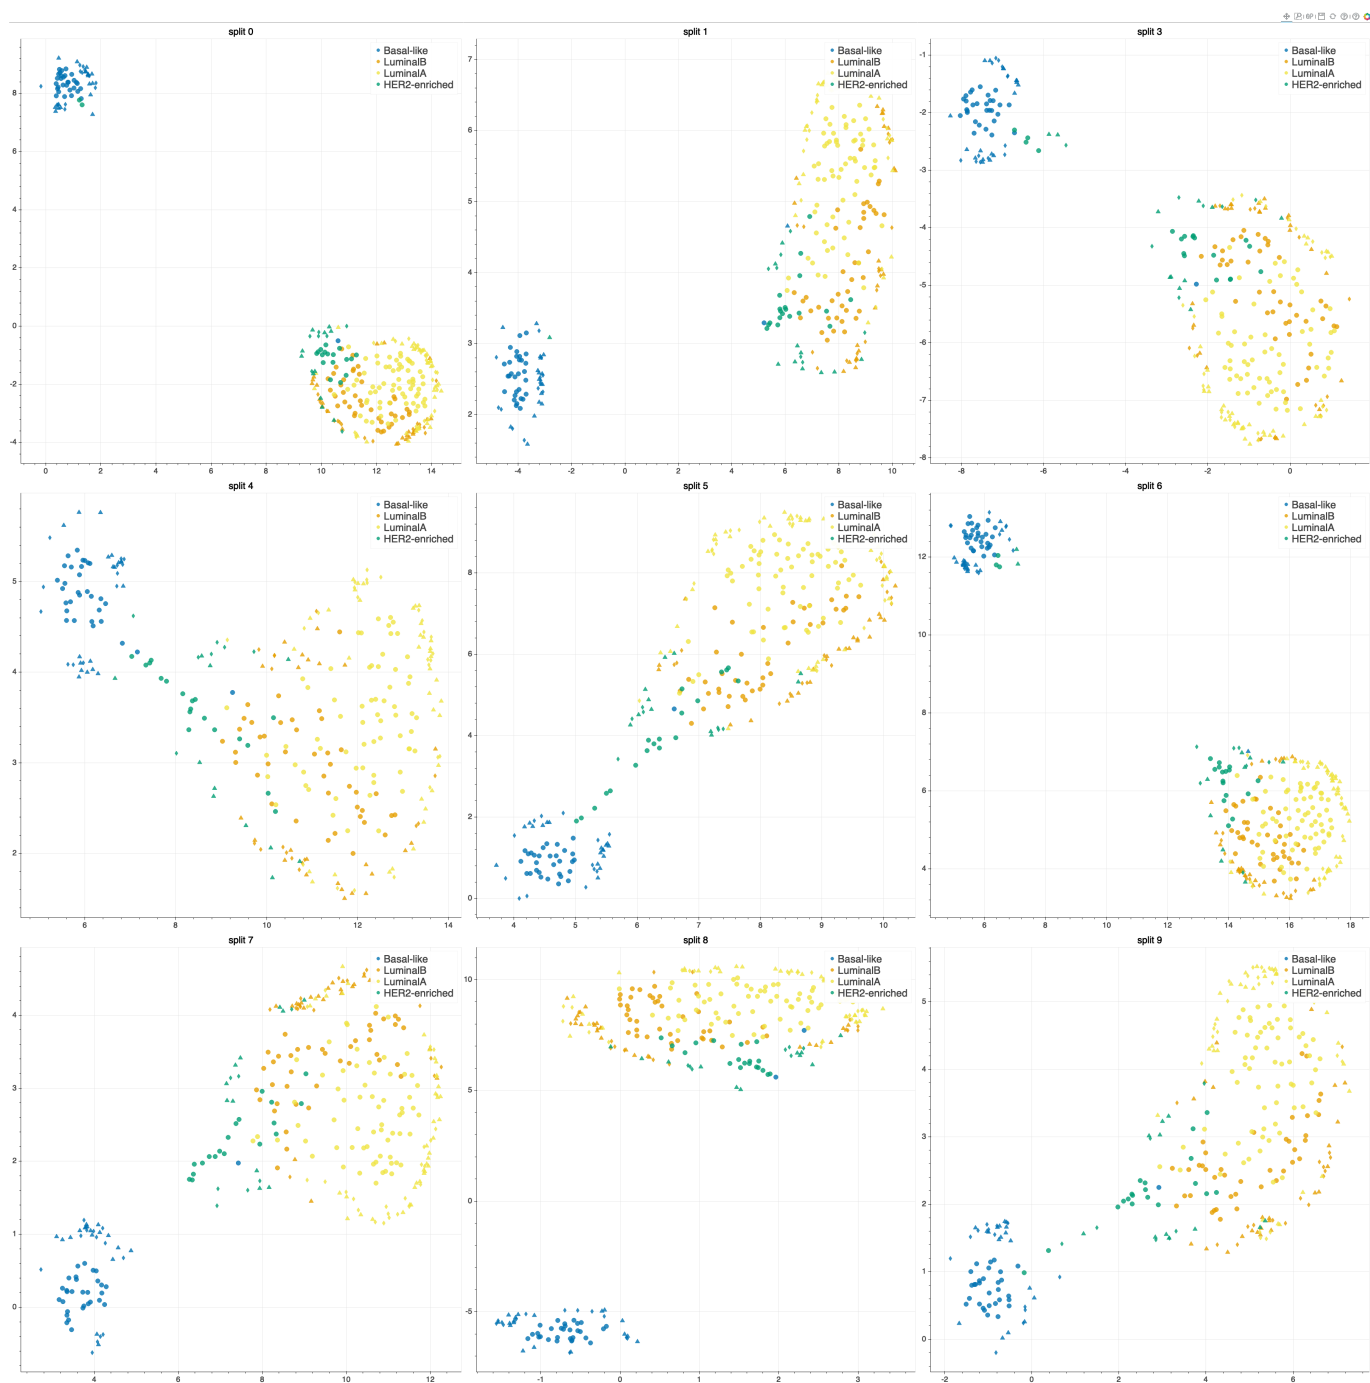

Supplement: Supplementary file [file media-1.pdf]
